# Supplementary material for: Protocol: High-throughput and quantitative assays of auxin and auxin precursors from minute tissue samples
Source: PubMed Central journal article supplement (PMC3457856; doi:10.1186/1746-4811-8-31), 2012-08-10
Supplement: 1746-4811-8-31-S2.pdf [file 1746-4811-8-31-S2.pdf]

## **Additional file 2-Protocol: Preparation of [<sup>13</sup>C<sub>11</sub>,<sup>15</sup>N]Indole-3-pyruvic acid (IPyA)**

► *CRITICAL*: For absolute quantification of IPyA in biological samples, a known amount of [<sup>13</sup>C<sub>11</sub>,<sup>15</sup>N]IPyA is added to each sample as the internal standard, and [<sup>13</sup>C<sub>11</sub>,<sup>15</sup>N<sub>1</sub>]IPyA has to be synthesized just prior to or no more than 2 days before use.

### **Materials:**

- 50 mM Phosphate buffer (pH 8.0), made from sodium phosphate monobasic (NaH<sub>2</sub>PO<sub>4</sub>, Sigma-Aldrich, cat. no. S8282) and sodium phosphate dibasic (Na<sub>2</sub>HPO<sub>4</sub>; Sigma-Aldrich, cat. no. S7907)
- 0.2 mg/ml Transaminase (Sigma-Aldrich, cat. no. T7684) in 50 mM phosphate buffer
  - *CRITICAL*: store as 100 µl aliquots at -20 °C. Use one aliquot for each reaction.
- [<sup>13</sup>C<sub>11</sub>,<sup>15</sup>N<sub>2</sub>]L- Trp (Cambridge Isotope Laboratories, cat. no. CNLM-2475)
- α-Ketoglutarate (Sigma-Aldrich, cat. no. K-1750)
- 5 mM Pyridoxal 5'-phosphate (PLP; Sigma-Aldrich, cat. no. 82870)
- 10 mM Ascorbic acid (Sigma-Aldrich, cat. no. A4544)
- 25% Phosphoric acid (PA) (ACS grade; Fisher, cat. no. A242)
- Indole-3-pyruvic acid (Sigma-Aldrich, cat. no. I7017)
  - *CRITICAL*: the compound is sensitive to oxygen. Keep container tightly closed and store in a dry place at -20 °C.
- Ethyl acetate
- 50% Isopropanol

### **Synthesis of [<sup>13</sup>C<sub>11</sub>,<sup>15</sup>N]IPyA using an enzyme-catalyzed transamination reaction**

1. Let one aliquot of transaminase solution thaw on ice.
2. In 1 ml of 50 mM phosphate buffer (pH 8.0), add 1 mg [<sup>13</sup>C<sub>11</sub>,<sup>15</sup>N<sub>2</sub>]Trp and 1 mg α-ketoglutarate.
3. Add 20 µl 5 mM PLP and one aliquot of transaminase solution.
4. Mix the solution gently by inverting the tube several times.
5. Incubate the reaction mixture at 37 °C in the dark for 3 h.

6. Add 1 ml 10 mM ascorbic acid and 50  $\mu$ l 25% PA to bring the pH to 2.5.
7. Add 600  $\mu$ l ethyl acetate to partition the synthesized [ $^{13}\text{C}_{11}$ ,  $^{15}\text{N}$ ]IPyA.
8. Collect ethyl acetate (upper layer) into a 2-ml amber glass vial.
9. Add another 600  $\mu$ l ethyl acetate to partition, and collect the ethyl acetate into the same amber glass vial.
10. Evaporate ethyl acetate to complete dryness using a gentle  $\text{N}_2$  gas stream in a sand bath heated to 55  $^\circ\text{C}$ .
11. Re-suspend the [ $^{13}\text{C}_{11}$ ,  $^{15}\text{N}$ ]IPyA in 1 ml 50% isopropanol. The product can be verified by GC-MS using a “Full Scan” mode after  $\text{NaBH}_4$  derivatization (see the procedure in the main text). An example spectral scan is shown in **Additional Figure 2**, which illustrates the identity and purity of the labeled compound.
12. Cap the vial and store the solution at -20  $^\circ\text{C}$ .
13. The yield of [ $^{13}\text{C}_{11}$ ,  $^{15}\text{N}$ ]IPyA is about 0.1 mg.

► **CRITICAL:** The concentration of the [ $^{13}\text{C}_{11}$ ,  $^{15}\text{N}$ ]IPyA solution has to be determined immediately before use (Step 2 in “Procedure”).

**Determine the concentration of [ $^{13}\text{C}_{11}$ ,  $^{15}\text{N}$ ]IPyA solution by reverse isotope dilution**

14. Freshly prepare 0.1 mg/ml unlabeled IPyA in 50% isopropanol.
15. Freshly prepare 20 mg/ml  $\text{NaB}^2\text{H}_4$  in 0.3 N NaOH.
16. In a 0.5-ml microcentrifuge tube, accurately add 5  $\mu$ l each of unlabeled IPyA and synthesized [ $^{13}\text{C}_{11}$ ,  $^{15}\text{N}$ ]IPyA solution.
- **CRITICAL STEP:** for the ease of calculation in Step 15, it is recommended to add equal volumes of IPyA and [ $^{13}\text{C}_{11}$ ,  $^{15}\text{N}$ ]IPyA solutions.
17. Add 8  $\mu$ l  $\text{NaB}^2\text{H}_4$  solution and mix well.
18. Incubate the tube at 37  $^\circ\text{C}$  for 30 min.
19. Add 5  $\mu$ l 25% PA to acidify the mixture and consume the residual  $\text{NaB}^2\text{H}_4$ .
20. Add 200  $\mu$ l water and mix well.

21. Extract the reduced IPyA (now ILA) by adding 100  $\mu$ l ethyl acetate to partition.
22. Collect the ethyl acetate extract in a 2-ml clear glass vial.
23. Add 100  $\mu$ l methanol to the vial.
24. Methylate the sample by filling the vial with ethereal diazomethane.
25. Evaporate the solvents until complete dryness using a  $N_2$  gas stream.
26. Re-suspend the compounds in 1 ml of ethyl acetate.
27. Analyze the sample using GC-MS/MS under SRM mode. For unlabeled methyl-ILA, the transition of parent ion  $m/z$  220 to the product ion  $m/z$  130 is monitored; for methyl- $[^{13}C_{11}, ^{15}N]$ ILA, the transition of parent ion  $m/z$  232 to the product ion  $m/z$  140 is monitored.
28. The ion abundance ratio of  $m/z$  130 over  $m/z$  140 equals the ratio of IPyA concentration over  $[^{13}C_{11}, ^{15}N]$ IPyA concentration in the initial sample.

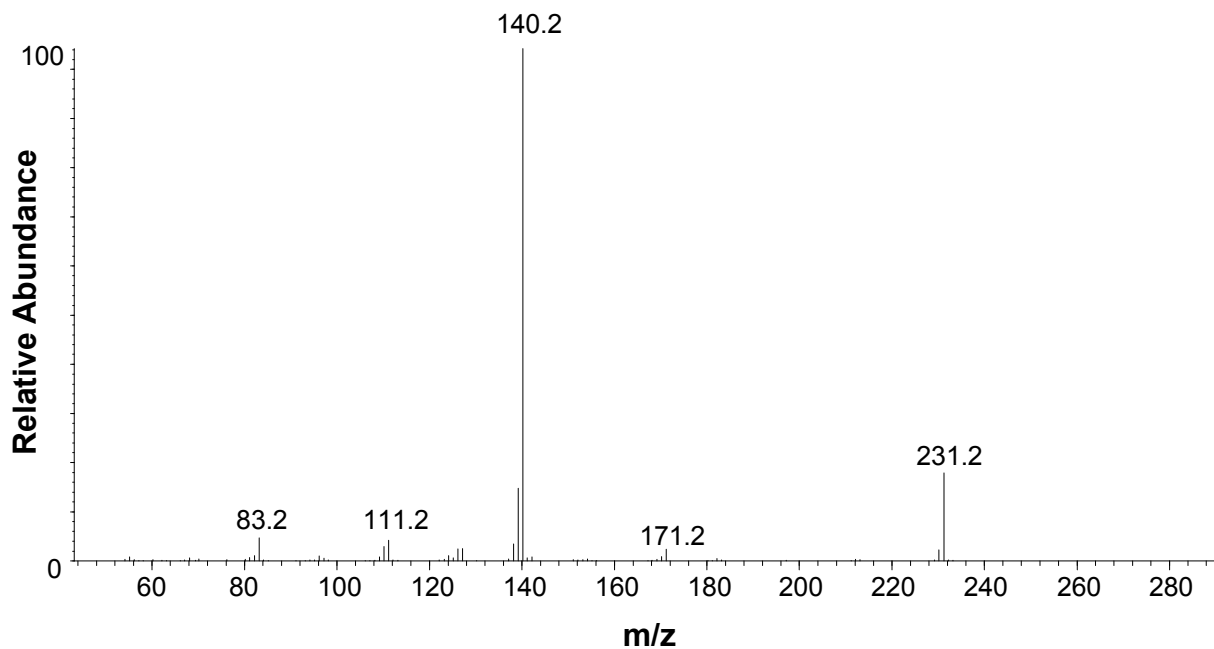

**Additional Figure 2** Analyses of  $[^{13}\text{C}_{11}, ^{15}\text{N}]$ IPyA internal standards. A full-scan mass spectrum showing ions generated from Me- $[^{13}\text{C}_{11}, ^{15}\text{N}]$ ILA.
